# Supplementary material for: Synthesis and structure of the first boron-bridged constrained geometry complexes
Source: Royal Society of Chemistry journal article supplement (doi:10.1039/b000380h), 2000-01-01
Supplement: b000380h.doc [file b000380h.doc]

**Supplementary material**

**Experimental procedures:**

1. Preparation of [{**5:**1-C5H4B(N*i*Pr2)NPh}Ti(NMe2)2] (**1**)

0.83 g (3.09 mmol) *i*pr2NB(C5H5)NPhH were dissolved in 15 ml of toluene and treated at –78 °C with 0.69 g (3.09 mmol) [Ti(NMe2)4] in 5 ml toluene. After stirring for 20 min the mixture was allowed to come to ambient temperature while the colour of the solution changed from orange to red. The mixture was stirred for additional 2 h at ambient temperature, and 1 h at 40° C. All volatiles were removed in high vacuum, the solid residue was dissolved in 20 ml hexane, and stored at –30° C to yield 0.97 g (78 %) of **1** as an orange crystalline solid.

1. Preparation of [{**5:**1-C5H4B(N*i*Pr2)NPh}TiCl2] (**2**)

A solution of 0.17 g (0.42 mmol) **1** in 10 ml hexane was treated with 0.50 g (4.60 mmol) (CH3)3SiCl in 2 ml hexane at 0 °C. The solution was allowed to come to ambient temperature, and stirred for 16 h. A yellow solid precipitated which was isolated by filtration and washed twice with hexane (10 ml) and dried in high vacuum to give 0.16 g (98%) of **2**.

c) Preparation of *i*pr2NB(C5H5)NPhH

A solution of 5.40 g (30.00 mmol) *i*pr2NBCl2 in 10 ml hexane was added at 0 °C to a suspension of 2.64 g (30.00 mmol) NaC5H5 in 25 ml hexane. The mixture was warmed to ambient temperature and stirred for additional 2 h. The precipitated NaCl was filtred off, and the filtrate was slowly added to a suspension of 3.15 g (32.00 mmol) Li[NPhH] in 20 ml toluene at 0° C. The suspension was warmed to ambient temperature and stirred for 16 h. All volatiles were removed in high vacuum, and the slightly yellow residue was extracted with 20 ml benzene, filtred, and the filtrate was evaporated to dryness in high vacuum. The remaining solid was sublimed at 85 °C in high vacuum yielding 7.91 g (98%) of *i*pr2NB(C5H5)NPhH as a colourless solid.

1H-NMR (499.658 MHz, CD2Cl2):  = 1.23 (br, 12 H, CHC*H*3), 2.86 (m, 2 H, C5H5), 3.59 (m, 2 H, C*H*CH3), 5.08 (br, 1 H, NH), 6.2 – 7.2 (m, 8 H ,C5H5, C6H5). – 11B-NMR (160.310 MHz, CD2Cl2):  = 30.06. – 13C-NMR (125.639 MHz, CD2Cl2):  = 23.96, 45.71, 43.44, 46.58 (br), 133.28 (C5H5), 135.50 (C5H5), 137.74 (C5H5), 118.70, 119.64, 128.78, 146.10.

MS (EI) [m/z, %]: 268 [M+, 20], 253 [M+-Me, 50], 93 [C6H5NH2+, 100], 65 [C5H5+, 30].

Correct elemental analysis.

Polymerisation experiments

Polymerisations were carried out in a 500 ml glass autoclave (Büchi). The reactor was filled under argon with toluene, catalyst compound and methylaluminoxane (MAO) in a ratio of 1:1000. After heating to 60 °C and stirring for 10 min 5 bar of ethene were applied. After 30 min the polymerisation was stopped by injecting 50 ml of acidified methanol (10 vol.-% HCl). The polymers were precipitated by pouring into 800 ml of methanol, filtred, washed with 50 ml toluene and 50 ml methanol and dried in high vacuo at elevated temperatures to constant weight.
